# Supplementary material
Source: Royal Society of Chemistry journal article supplement (doi:10.1039/d5ta09765g)
Supplement: d5ta09765g1.pdf [file d5ta09765g1.pdf]

## Supporting Information

# Comparative Study of Nickel-Silica Catalyst Architectures for CO<sub>2</sub> Methanation: Insights into Structure-Performance Relationships

*Clara Vilela Weikert*<sup>1,2</sup>, *Marcia Araque*<sup>2</sup>, *Benjamin Katryniok*<sup>2</sup>, *Fabio Souza Toniolo*<sup>1</sup>, *Fábio Bellot Noronha*<sup>2,3\*</sup>

<sup>1</sup> Chemical Engineering Program, COPPE, Federal University of Rio de Janeiro, Rio de Janeiro, RJ 21941-972, Brazil.

<sup>2</sup> Univ. Lille, CNRS, Centrale Lille, Univ. Artois, UMR 8181-UCCS - Unité de Catalyse et de Chimie du Solide, 59000 Lille, France

<sup>3</sup> National Institute of Technology, Catalysis, Biocatalysis and Chemical Processes Division, Rio de Janeiro, RJ 20081-312, Brazil.

\*Corresponding Author: email: [fabio.bellot@int.gov.br](mailto:fabio.bellot@int.gov.br)

Submitted to  
**Journal of Materials Chemistry A**

April 2026

- **Transmission Electron Microscopy (TEM) of Calcined Catalysts**

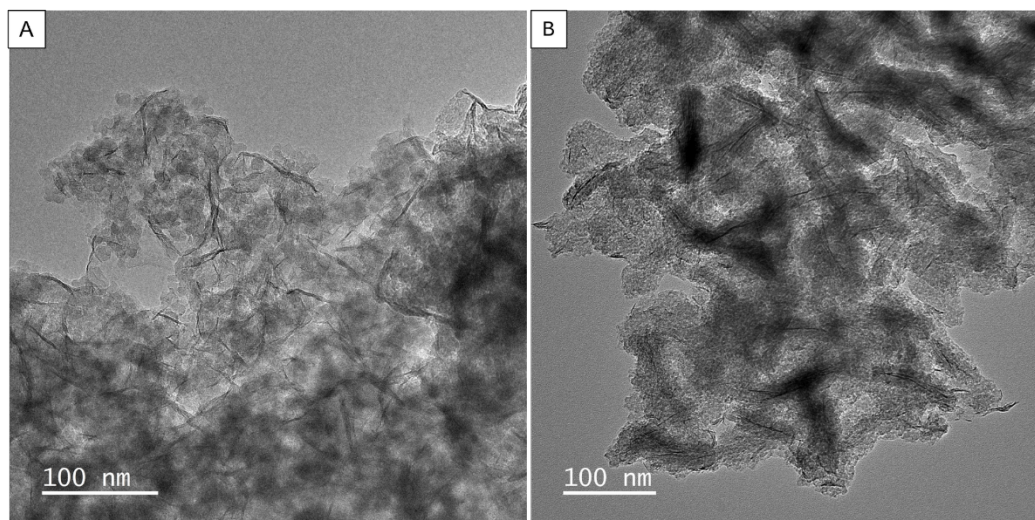

**Figure S1.** TEM images of the Ni@SiO<sub>2</sub> calcined catalysts: (A) SUP; (B) EMBD.

- **N<sub>2</sub> physisorption:**

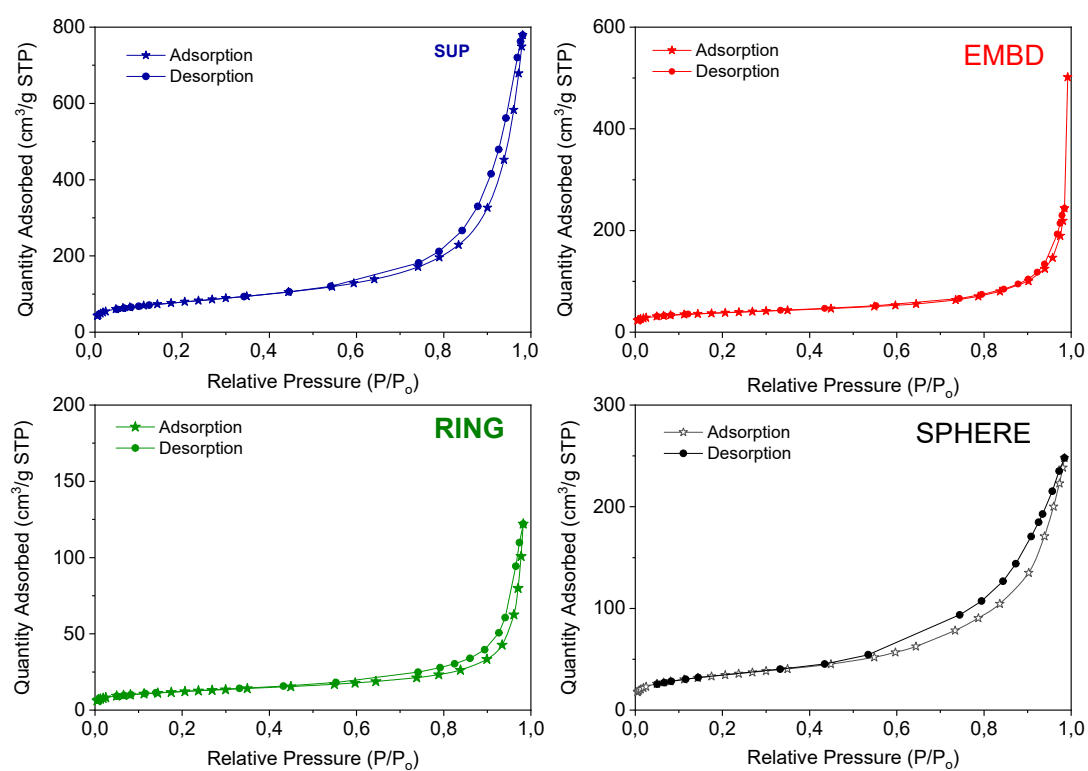

**Figure S2.** N<sub>2</sub> adsorption/desorption isotherms of the catalysts calcined

- X-Ray Diffraction (XRD):

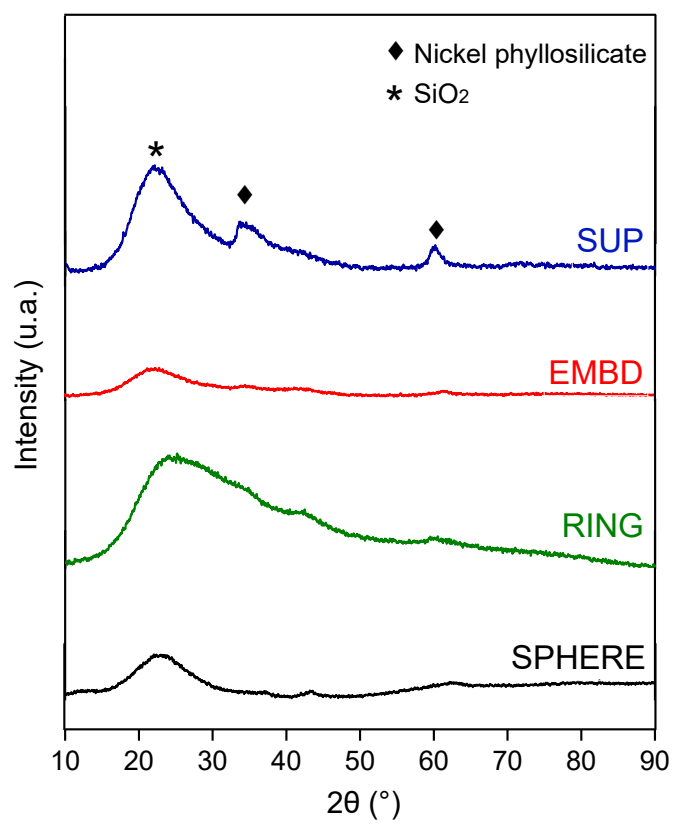

**Figure S3.** X-ray diffractograms of the catalysts: (A) SUP, (B) EMBD, (C) RING, (D) SPHERE.



- **CH<sub>4</sub> formation rate as a function of different temperatures in the CO<sub>2</sub> methanation reaction for the catalysts.**

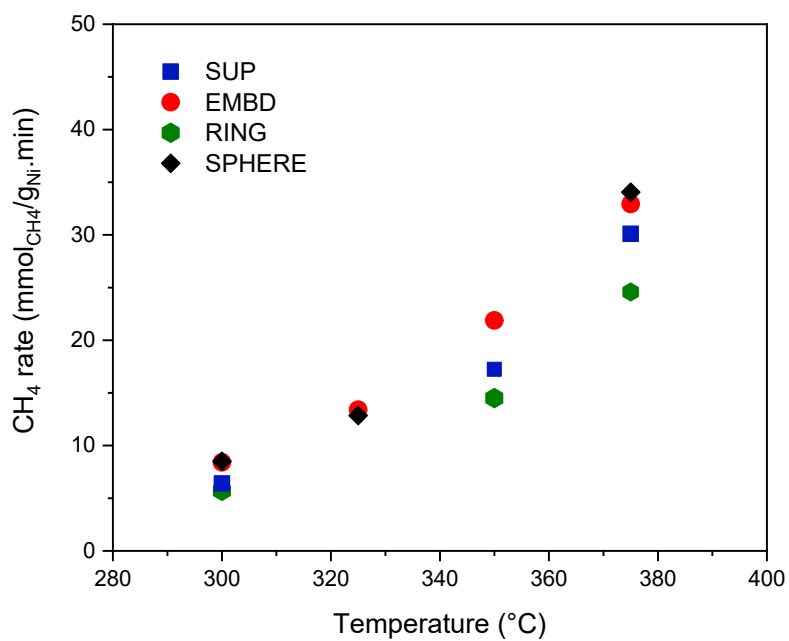

**Figure S5.** CH<sub>4</sub> formation rate as a function of different temperatures in the CO<sub>2</sub> methanation reaction for the catalysts.
